# 1 Microbiome in drinking water treatment and distribution: a critical 2 review and meta-analysis from source to tap

3

4 Claire Thom<sup>1,2\*</sup>, Cindy J Smith<sup>1</sup>, Graeme Moore<sup>2</sup>, Paul Weir<sup>2\*</sup>, Umer Z Ijaz<sup>1</sup>

5 \*Corresponding author

6 <sup>1</sup>: Infrastructure and Environment Research Division, James Watt School of Engineering,  
7 University of Glasgow

8

9 <sup>2</sup>: Scottish Water, 6 Castle Drive Dunfermline, KY11 8GG

10

## 11 Highlights

12

- 13 • Meta-analysis of 27 16S rRNA studies from drinking water systems, comprising 1994  
14 samples, identifying 4556 AVS from full length 16S rRNA gene sequences
- 15 • We have demonstrated that DWDS microbiomes are more strongly affected by  
16 stochastic processes.
- 17 • Chlorine has a stronger selective pressure on the assembly of the microbiome than  
18 filtration processes
- 19 • Pathogens such as *Firmicutes* form co-exclusionary relationships with other phyla  
20 after the addition of chlorine.
- 21 • *Legionella* abundance may be a good indicator of treatment performance for water  
22 utilities.

- 23 • Changes in species abundance and richness may be useful in detecting contamination  
24 in DWDS for water utilities.

25

## 26 Abstract

27 A meta-analysis of existing available Illumina 16S rRNA datasets from drinking water  
28 source, treatment and DWDS were collated to compare changes in abundance and diversity  
29 throughout. Samples from bulk water and biofilm were used to assess principles governing  
30 microbial community assembly and the value of amplicon sequencing to water utilities.  
31 Individual phyla relationships were explored to identify competitive or synergistic factors  
32 governing DWDS microbiomes. The relative importance of stochasticity in the assembly of  
33 the DWDS microbiome was considered to identify the significance of source and treatment in  
34 determining communities in DWDS. Treatment of water significantly reduces overall species  
35 abundance and richness, with chlorination of water providing the most impact to individual  
36 taxa relationships. The assembly of microbial communities in the bulk water of the source,  
37 primary treatment process and DWDS is governed by more stochastic processes, as is the  
38 DWDS biofilm. DWDS biofilm is significantly different to bulk water in terms of local  
39 contribution to beta diversity and in types of taxa present. Water immediately post  
40 chlorination has a more deterministic microbial assembly, highlighting the significance of  
41 this process in changing the microbiome although elevated levels of stochasticity in DWDS  
42 samples suggest that this may not be the case at customer taps. 16S rRNA sequencing is  
43 becoming more routine and may have several uses for water utilities including detection and  
44 risk assessment of emerging pathogens like *Legionella*, *Bacteroides* and *Mycobacterium*;  
45 assessing the risk of nitrification of DWDS; improved indicators of process performance and  
46 monitoring for significant changes in the microbial community to detect contamination.

47 Combining this with other quantitative methods like flow cytometry will allow a greater  
48 depth of understanding of the DWDS microbiome.

49

50 Graphical abstract

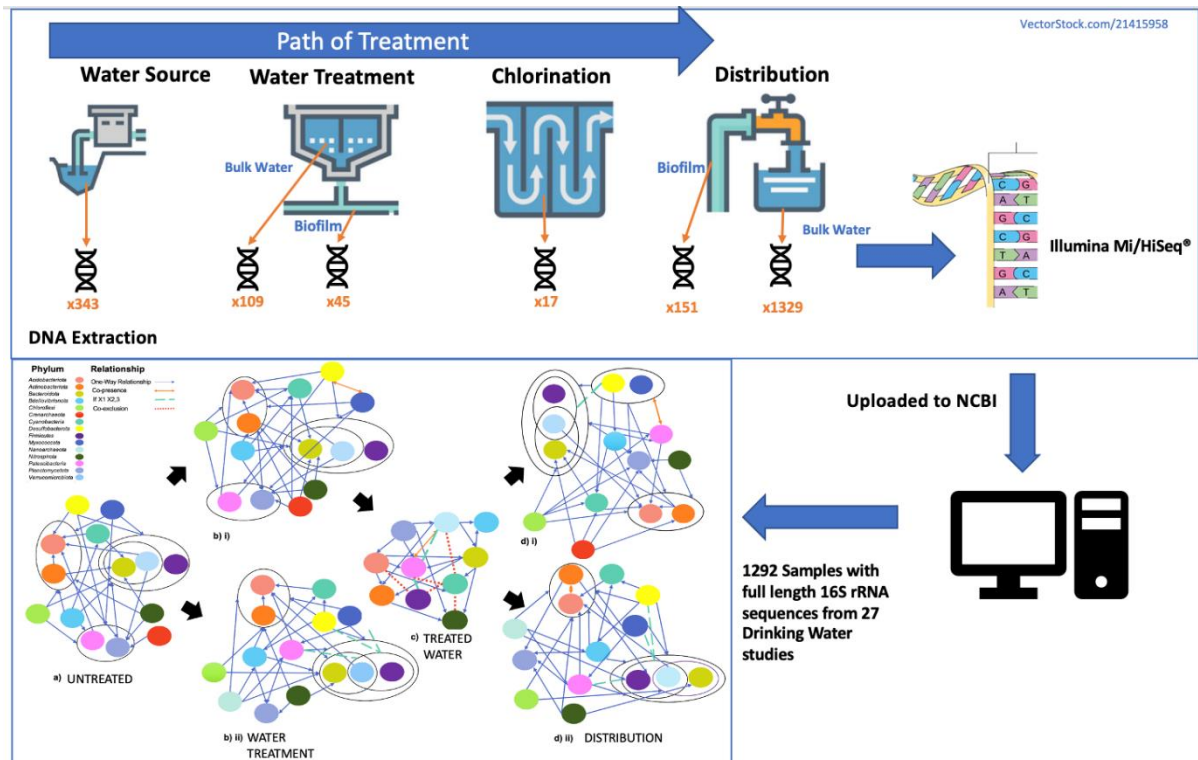

51

52 Key Words

53 Drinking water, amplicon sequencing, microbiome, pathogens, bacteria, biofilm

54 1.Introduction

55 The safety of drinking water supplies is of paramount importance for public health. Water  
56 utilities are responsible for the treatment and delivery of potable water. While treatment is  
57 highly effective to remove traditional faecal indicator organisms, the microbial challenge  
58 remains significant as water-borne disease outbreaks associated with drinking water  
59 distribution systems (DWDS) still have significant public health implications, which may not

60 correlate with traditional water quality metrics<sup>1-5</sup>. Water treatment processes, such as filtration  
61 and disinfection, are the primary barriers to the presence of harmful pathogens in drinking  
62 water. These are commonly employed strategies for water treatment across the world.  
63 Coagulation of colloidal material and subsequent filtration through rapid gravity sand filters,  
64 followed by disinfection with a chlorine-based biocide remains the most common method of  
65 treatment in many countries. Although there are several other treatment strategies including:  
66 slow sand filtration, biological filtration, ozonation and membrane filtration which satisfy  
67 drinking water regulations.

68

69 Regulations on the microbial safety of drinking water supplies focus on the likelihood of faecal  
70 contamination, using presence of coliform bacteria and specifically *E. coli* as a surrogate for  
71 the wide range of pathogens potentially present in faeces. These are measured using culture-  
72 based tests that isolate and enumerate coliforms and *E. coli* specifically. These methods have  
73 been broadly unchanged for over 100 years. Compliance with these metrics is high in the UK  
74 (>99%)<sup>6</sup>, although isolated, sporadic, and low-level total coliform detections remain a problem  
75 for utilities. These indicators are now known to be problematic in that, more than 99% of  
76 bacteria are unculturable<sup>7,8</sup>; there are emerging pathogens in drinking water which are not  
77 faecal associated, e.g., *Mycobacterium* and *Legionella*; and the correlation between total  
78 coliforms and other pathogenic indicators is poor<sup>2,9,10</sup>. Moreover, culture tests assess a small  
79 volume (~100 mL), and a confirmed result takes over two days, meaning rapid changes in  
80 water quality are unable to be detected. There is therefore a need for alternative high-  
81 throughput methods of microbial characterisation to assess the diversity of microbial  
82 communities across space and time. Quantitative polymerase chain reaction (qPCR) methods  
83 are capable of identification of specific pathogens or target organisms but are limited in the  
84 amount of information they give about the overall microbiome. In contrast, Flow Cytometry

85 (FCM) is a rapid high-throughput methodology to count all intact and damaged bacterial cells  
86 *in situ* without the need for culturing. This has been adopted by water utilities in recent years  
87 due to its accuracy and speed but can only give an indirect view of water quality risk as cells  
88 are not taxonomically identified. It should also be stated that despite its limitations culturing  
89 remains the only direct method of determining a cells viability.

90

91 The treatment of drinking water in general reduces the abundance and diversity of micro-  
92 organisms present, while removing harmful pathogens, yet a diverse microbiome remains  
93 associated with potable water, including pathogenic microbes. The drinking water microbiome  
94 at customer taps may be influenced by a range of factors including source water, treatment,  
95 flow conditions and DWDS biofilms. Water treatment is proposed to have a deterministic  
96 effect, selecting microbes that survive filtration and disinfection processes<sup>11,12</sup>. This effect is  
97 likely to reduce with distance and time from treatment, where biofilm growth and disturbance  
98 become more prominent. At this point stochastic (random) effects are more likely to govern  
99 the assembly of microbial communities. Thus, drinking water microbiomes are dynamic  
100 through treatment, time, and location. To aid water utilities direct and control these to deliver  
101 safe potable water a deeper understanding of these changes, consequences, and impact on both  
102 the microbiome and the prevalence of pathogens is needed, moving from descriptive to  
103 predictive understanding.

104

105 16S rRNA amplicon sequencing technology can be used to characterise and identify  
106 microbial communities in DWDS across space and time. While the taxonomic resolution that  
107 can be achieved depends on the 16S rRNA hypervariable region sequenced and the type and  
108 abundance of the taxa detected<sup>13</sup>, the approach has been widely applied in academia since  
109 circa 2010 to explore microbial communities of drinking water to both assess diversity and

110 identify pathogens of concern to public health. This method has broad advantages over qPCR  
111 and FCM in the large amount of taxonomic information that it provides, although its  
112 disadvantages are that it is non-quantitative and cell viability is unable to be determined.  
113 Most 16S rRNA studies are discrete, commonly across a single or few DWDS within a  
114 geographical area. Studies tend to focus on one part of a system, e.g., source waters; efficacy  
115 of treatment processes; variations of biofilm communities in space, time, or operating  
116 conditions within a pipe distribution network; influences of domestic plumbing arrangements,  
117 or differences between the bulk water and biofilm communities<sup>14-43</sup>. While several of these  
118 studies have provided new insight into drinking water microbiome, as aforementioned they  
119 tend to be descriptive and not predictive. There is a need for further insight, at a global level,  
120 into the principles governing drinking water microbiomes to gain further understanding of the  
121 ecological rules determining microbial assembly through the treatment process to the tap if  
122 amplicon sequencing is to be of use to utilities. Here we present a critical review of current  
123 understanding and further conduct a meta-analysis of 16S rRNA studies from source to tap to  
124 explore global distribution and commonalities in the drinking water microbiome. We further  
125 consider the contribution and potential of 16S rRNA amplicon sequencing as an analytical  
126 tool for water utilities as a common conclusion to several studies is that 16S rRNA amplicon  
127 sequencing is beneficial in assessing risk to public health in DWDS, although there are many  
128 areas for further investigation to understand the implications of the results<sup>14</sup>.

## 129 Source Waters

130 Several studies have sought to assess the impact of source water on the microbial  
131 communities in DWDS, with groundwater sources less phylogenetically diverse than that of  
132 surface waters<sup>15</sup>. Some studies propose that the composition of taxa in DWDS are strongly  
133 determined by those which are present in the source water<sup>15</sup>. For example, land-use in the

134 catchment of source waters can impact the microbial communities present in terms of  
135 abundance and diversity, as demonstrated by significant differences between urban and  
136 agricultural catchments in Canada. *Bacteroides* was identified as a potential future indicator  
137 of source contamination for both catchment types<sup>37</sup>. 16S rRNA amplicon sequencing  
138 combined with microbial source tracking can identify contamination sources, although these  
139 methods correlate poorly with each other and traditional faecal indicators<sup>38</sup>. Eighty-one  
140 potentially pathogenic bacteria were detected within drinking water source waters using 16S  
141 rRNA amplicon sequencing, with little correlation to indicator organisms like coliforms  
142 and *E. coli*<sup>26</sup>. These studies show that amplicon sequencing has the capability to detect  
143 pathogenic microbes in drinking water systems, although further assessment of how this  
144 relates to regulatory parameters like indicator bacteria is required. It also must be noted that  
145 the presence of DNA does not necessarily imply viability, with DNA from dead cells and  
146 extracellular DNA contributing to DNA extractions. Prior sample treatment, for example with  
147 propidium monoazide<sup>44,45</sup>, may aid inform viability by removing cell with damaged cell walls  
148 prior to DNA extraction. Yet further investigation would still be required to confirm cell  
149 viability, a current limitation of 16S rRNA approaches.

150

## 151 [Water Treatment](#)

152 Some individual studies have focused on the relative importance of treatment in influencing  
153 downstream microbial communities, with the processes of filtration and chlorination reducing  
154 overall microbial diversity and affecting the abundance of particular phyla<sup>39-43</sup>. Biofilters can  
155 be extremely microbially diverse with different operational conditions causing changes to  
156 relative taxa abundances<sup>39,43,46</sup>. The upstream process also significantly affects filter  
157 biomass<sup>16,17</sup>. Various treatment and disinfectant types have variable effects on the abundance  
158 of different phyla, with no-one treatment type effectively removing all pathogens<sup>18,19</sup>.

159 Although chlorination effectively reduces microbial abundance, pathogens such  
160 as *Pseudomonas*, *Acinetobacter*, *Citrobacter*, *Mycobacterium*, *Salmonella*, *Staphylococcus*,  
161 *Legionella*, *Streptococcus*, and *Enterococcus* have all been detected in treated water,  
162 indicating that further work is needed to assess and improve the robustness of treatment<sup>42</sup>.  
163 Overall, the microbial diversity in individual published studies were highly specific to the  
164 treatment process employed and a range of study specific pathogens were detected.  
165 Therefore, wider assessment of treatment and DWDS is required to understand whether these  
166 pathogens are specific to those systems or a wider problem in drinking water. In addition,  
167 organisms responsible for nitrification such as *Nitrospira* are also seen to be abundant  
168 throughout treatment and into DWDS<sup>20-22</sup>.

169

## 170 Drinking Water Distribution Systems (DWDS)

171 The majority of 16S rRNA amplicon sequencing studies have focused on microbial  
172 communities within DWDS, in both biofilm and bulk water. These indicate that the microbial  
173 communities within DWDS are unique to that system, influenced by the source and treatment  
174 characteristics outlined above<sup>23,24</sup>. DWDS microbial communities have significant temporal  
175 fluctuation<sup>25,27</sup>, with potential diurnal cycles in bulk-water, potentially due to flow patterns<sup>28</sup>.  
176 The dynamics of microbial communities in bulk water may be seasonal. Higher diversities  
177 and abundances of microbial communities may be more evident in winter compared to  
178 summer months<sup>19</sup>. DWDS may also have significant spatial variation<sup>19</sup>. A meta-analysis of  
179 14 pyrosequencing studies of water distribution systems compared the bacterial communities  
180 present under different disinfectant regimes, confirming that the microbial communities in  
181 DWDS are more diverse and abundant than those with a free chlorine residual. *Legionella*,  
182 *Mycobacterium*, and *Pseudomonas* were all significantly reduced by the presence of a free  
183 chlorine residual in one study<sup>28</sup>. However, it is unknown whether free chlorine residual is



184 significant in reducing diversity across all DWDS or whether source and treatment processes  
185 may also play a significant role. 16S rRNA amplicon sequencing is a powerful tool to aid  
186 identify risk, as it can identify potential pathogenic microbes in distribution<sup>21,29–32</sup>. However,  
187 as mentioned above, it is unable to distinguish between alive or dead cells. What is unclear  
188 from the individual studies is whether certain pathogens are common to DWDS in general,  
189 and what is their source.

190

### 191 Biofilm vs. Bulk- Water

192 Biofilm and bulk water samples in distribution have also been shown in several individual  
193 studies to vary significantly<sup>30,33–35</sup>. Biofilm deposition influences bulk water communities  
194 when loose deposits or biofilm are disturbed<sup>30,35,47</sup>. Biofilms can significantly contribute to  
195 microbial loading in DWDS, with the composition affected by the presence of a chlorine  
196 residual<sup>36</sup>. Mechanical cleaning also changes the microbial composition of biofilms, with a  
197 lag effect in bacterial concentrations observed after cleaning followed by a regrowth phase<sup>36</sup>.  
198 A recent study in Sweden explored how the bulk water and biofilm in DWDS were affected  
199 by ultrafiltration membrane (UF) installation using source tracking software. Bacteria in the  
200 bulk water came from treatment (99.5%) before the installation of UF. Post-UF, there was a  
201 significant reduction in cells, and 58% were quantified to have come from biofilm in the  
202 DWDS<sup>22</sup>. These results suggest that when large volumes of bacteria are removed throughout  
203 treatment processes, the relative influence of the biofilm may become larger. As biofilms  
204 have been demonstrated to differ from bulk water in terms of taxa and potentially harbour  
205 pathogens, this is likely to affect water quality. Further understanding of how treatment,  
206 source, and biofilm in distribution affect DWDS microbiomes is required for water utilities to  
207 understand the impacts of changing treatment processes.

208

209 Aims and objectives

210

211 While these studies have provided new understanding of drinking water microbiomes a  
212 limitation is that they are in general descriptive snap shots of a given time/treatment etc that  
213 by themselves limit current ability to define global rules to facilitate predictive management  
214 of water treatment and quality. Add to this variability in the methods used (DNA extraction,  
215 16S rRNA hypervariable region, sequencing platform etc) and the complex system-specific  
216 nature of DWDS, all contribute towards making it difficult to gain a more general  
217 understanding of how drinking water microbial communities change from source to tap and  
218 what are the factors driving these changes that can be utilised by water utilities to manage  
219 water quality. For example, many studies have identified pathogens of concern in individual  
220 systems, but it is still unclear whether these pathogens are common to all DWDS, or an  
221 artifact of specific systems. The relative importance of the deterministic influence of source  
222 and treatment is also an important question as is the need to understand how phyla common  
223 to all DWDS interact with each other as competitive influences between taxa may affect the  
224 microbiome. The lack of understanding of the principles governing the diversity and  
225 abundance of DWDS microbial communities has made it difficult to predict/control drinking  
226 water microbiomes and therefore also for water utilities to adopt the understanding derived  
227 from amplicon sequencing approaches as a tool to aid manage water quality, including  
228 pathogen detection.

229

230 Therefore, the specific aims of this meta-analysis were to identify commonalities in DWDS  
231 microbiomes across the world, which can be used to further understanding of water quality  
232 for utilities; to understand the relative importance of the deterministic effects of source and

233 treatment on the microbiomes of DWDS and explore key relationships between phyla  
 234 present.

## 235 2.Methods

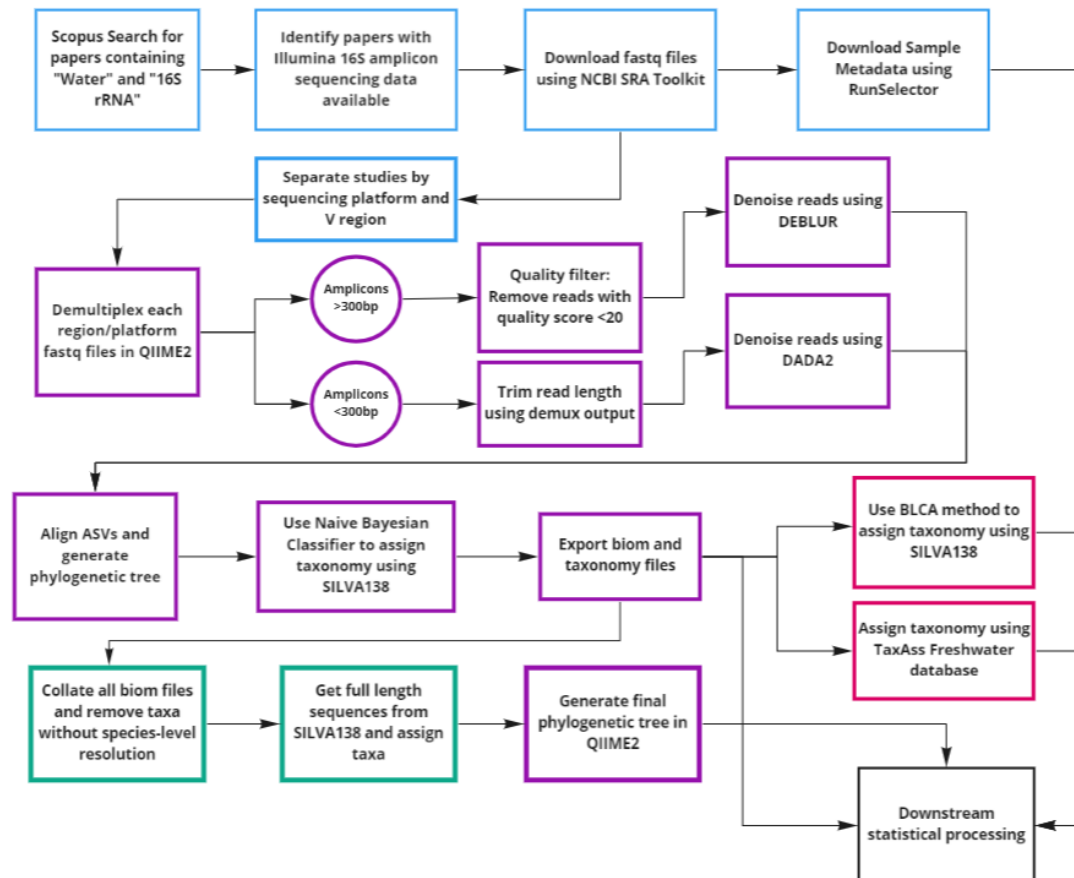

236

237

238 Figure 1: An overview of the methodologies to generate Amplicon Sequencing Variants (ASVs) applied in this meta-

239

analysis.

240

### 241 2.1 Data Gathering

242 A Scopus search for all papers since 2010 using the following terms: “16S rRNA” and

243 “Water” was carried out. This search returned 176 results. Each result was individually

244 assessed to ascertain its relevance to this meta-analysis. Only studies using Illumina MiSeq or

245 HiSeq® platforms were included to minimise the different errors and biases associated with

246 alternative sequencing platforms such as Nanopore®, Ion Torrent® or older technologies  
247 such as Pyrosequencing. After this manual filter, 44 studies remained and were checked to  
248 ascertain sequence data availability. 26 studies had publicly available raw sequence data. For  
249 the remainder, requests to authors were made for data. A list of the papers used in the  
250 analysis can be found in the supplementary information. All raw data downloads used the  
251 SRA Toolkit provided by NCBI, except for one study from QIITA. Metadata for samples  
252 from NCBI's Run Selector included: sequencing platform; the hypervariable region of the  
253 16S rRNA gene sequenced; sample ID; sample date and time; and geolocation. Other  
254 relevant metadata from the published papers: sample location, disinfection type (if  
255 applicable), and whether the sample was from bulk water or biofilm was recorded. Before  
256 processing, studies were grouped by the hypervariable region of the 16S rRNA gene  
257 sequence. All studies included in this meta-analysis and relevant sample information are  
258 listed in the Supplementary Information section. In total 27 studies, with 1994 samples, from  
259 over 50 different DWDS were compared.

260

## 261 [2.2 Sequence Processing](#)

262 QIIME2 processed collated amplicon sequences for each platform and hypervariable V-  
263 region in Earth Microbiome Project Paired-end Sequencing Format (.fastq). QIIME2 can  
264 generate both Operational Taxonomic Units (OTUs) and Amplicon Sequencing Variants  
265 (ASVs) using a user-defined threshold (97% in this case). QIIME2 improves QIIME1 in  
266 terms of quality control of sequences using DADA2 and Deblur software, both of which were  
267 employed here. To provide enough overlap of forward and reverse reads to facilitate paired  
268 end reads, DADA2 was employed where amplicons were <250bp long and the quality score  
269 was >20. For amplicons spanning multiple V regions, DEBLUR commands allowed for the  
270 pairing of longer amplicons without significant loss of sequence length, as an explicit

271 threshold is not required. Output alpha diversity profiles may be significantly different when  
272 using different denoising software to generate ASVs<sup>48</sup>, so, runs of DEBLUR and DADA2  
273 were carried out for all regions and platforms. The final analyses generated  $3.32 \times 10^8$   
274 demultiplexed reads and 829713 ASVs in total from 1994 samples.

275

276 To identify the best taxonomic assignment, biome files and phylogenetic tree output from  
277 QIIME2 had taxonomy assigned using three approaches. These were: Naïve Bayesian  
278 Classification system (NBC), Bayesian Least Common Ancestor (BLCA) approach (using  
279 SILVA138 database), and the TaxAss database. TaxAss uses SILVA to generate a first pass  
280 of taxonomic assignment then a curated database of freshwater sequences to assign the  
281 remainder of ASVs. TaxAss was selected for downstream statistical processing as it provided  
282 the highest level of taxonomic recovery to the genus level (Appendix 1 Table 1). Finally,  
283 ASVs from all V regions were collated together in a single biome file. Sequences without  
284 species-level resolution were removed so that full-length 16S rRNA sequences could be  
285 obtained for all taxa as per the method used by<sup>49</sup> Of the 4858 taxa originally classified by  
286 TaxAss in the collated dataset, 4556 had available full-length sequences (loss of 6.2%). A  
287 final phylogenetic tree and biome file with taxonomy generated in QIIME2.

288

### 289 2.3 Statistical Analyses

290 The collated biome with taxonomy, phylogenetic tree, and metadata was then processed.  
291 Meta-sample groupings defined the sample location in the treatment and distribution process  
292 and if the sample originated from biofilm or bulk water. Shannon and Richness indexes were  
293 calculated for each meta-grouping to estimate alpha diversity (diversity within a sample). An  
294 analysis of the core microbiome was carried out in the R package Bioconductor, using an  
295 absolute detection method and a minimum prevalence of 85% for all groups except

296 Distributed and Untreated Water. These groups had significantly more samples and required  
297 a higher threshold of 95% (Lahti *et al.* 2017-2020<sup>50</sup>).

298

299 Beta diversity (or between-sample diversity) metrics were more complicated to assess, given  
300 the substantial number of samples (n=1994), their varying environments as well as spatial  
301 and temporal locations. Instead, calculation of Local Contribution to Beta Diversity (LCBD)  
302 for each group was made<sup>51</sup>. The Nearest Taxon Index (NTI) and Net Relatedness Index (NRI)  
303 from the Picante package in R ([http://kembellab.ca/r-](http://kembellab.ca/r-workshop/biodivR/SK_Biodiversity_R.html)  
304 [workshop/biodivR/SK\\_Biodiversity\\_R.html](http://kembellab.ca/r-workshop/biodivR/SK_Biodiversity_R.html)) were used to quantify Environmental filtering  
305 and stochasticity on community assembly. Higher NRI/NTI (above 0) values indicate  
306 deterministic factors influencing community assembly, lower values (below 0) indicate  
307 stochastic influences.

308

309 Patterns in beta diversity may not be continual, as multiple relationships may be affecting an  
310 organism at a specific time or place. Therefore, a new methodology by Golovko *et al.* (2020)  
311 was employed using Boolean patterns to assess relationships between individual ASVs in all  
312 meta-sample groups. This method uses a pattern-specific method to identify 2-dimensional  
313 relationships between 2 ASVs at a defined threshold, including one-way relationships, co-  
314 occurrence, and co-exclusion. This method can also quantify 3-dimensional relationships  
315 between ASVs. These are categorised as: all alone (type 1 co-exclusion); exclusion of ASV1  
316 by ASV2 or 3 (type 2 co-exclusion); If ASV1 is present, ASV2 and ASV3 are present, and  
317 finally, all three altogether. This method was applied to the ASVs in the dataset to identify  
318 any significant relationships at a phyla level.

319

## 320 3.Results

321

### 322 3.1 Taxonomic Profile

323

324 Within this analysis, taxonomic classification was resolved for a total of 4556 ASVs. The 25  
325 most abundant genera are shown in Figure 1. 1293 samples were from water distribution  
326 systems in bulk water, the largest meta-sample group. Bulk water from different distribution  
327 systems, as expected, is variable with differences in the abundances of the top 25 genera  
328 DWDS. However, there does appear to be some commonalities in taxa among DWDS with  
329 the same disinfectant residual: *Nitrosomonas* and *Pseudomonas* were abundant only in  
330 systems using a chloraminated residual. Pathogenic microbes such as *Mycobacterium* were  
331 common in both chlorinated and chloraminated systems. Biofilm samples in distribution were  
332 less numerous (n=193) and had a much higher taxonomic diversity than the bulk  
333 water. *Pseudomonas* was common in many samples in both chlorinated and chloraminated  
334 biofilms, but less so in those with no disinfectant residual.

335

336 Samples from water sources and treatment systems made up a much smaller proportion of the  
337 dataset and had differences in the most abundant taxa. Again, the most common genera were  
338 less abundant, except *Nitrospira*, which was more abundant throughout treatment than in  
339 distribution. *Burkholderiales* were also present throughout treatment and highly abundant in  
340 one bulk water study in the distribution. Source water samples were generally from surface  
341 waters, although a small proportion came from groundwater. Several untreated water samples  
342 show similar taxonomic profiles to each other. Globally all untreated water samples were  
343 highly diverse in comparison to treated water.



344

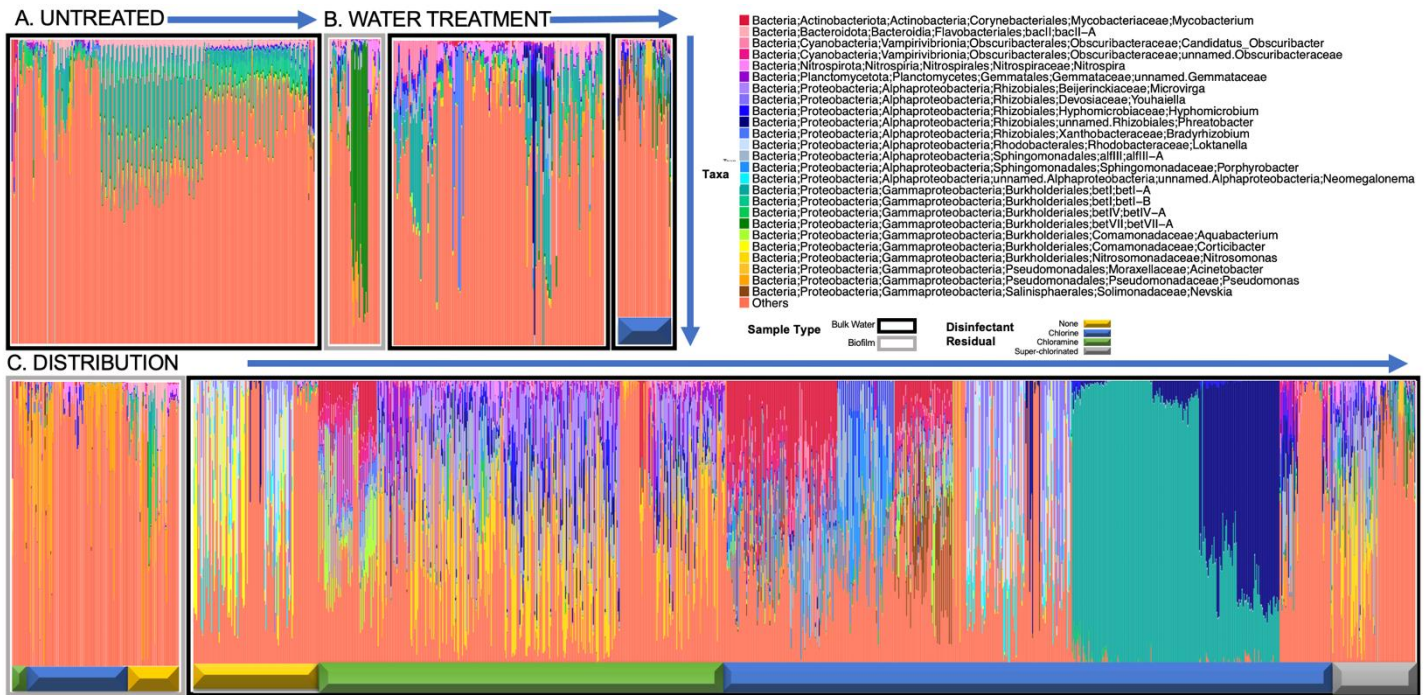

345

346 Figure 2: Proportion of most abundant genera for all samples in this meta-analysis, grouped by: A untreated water; B water  
 347 and biofilm isolated throughout treatment processes; C biofilm and bulk water sampled from distribution pipes. Where  
 348 appropriate, samples have been colour-coded by disinfectant residual: Free chlorine (blue); Chloraminated (green); None  
 349 (yellow); Super-chlorinated (grey).

350

### 351 3.2 Alpha Diversity & Core Microbiome

352



353

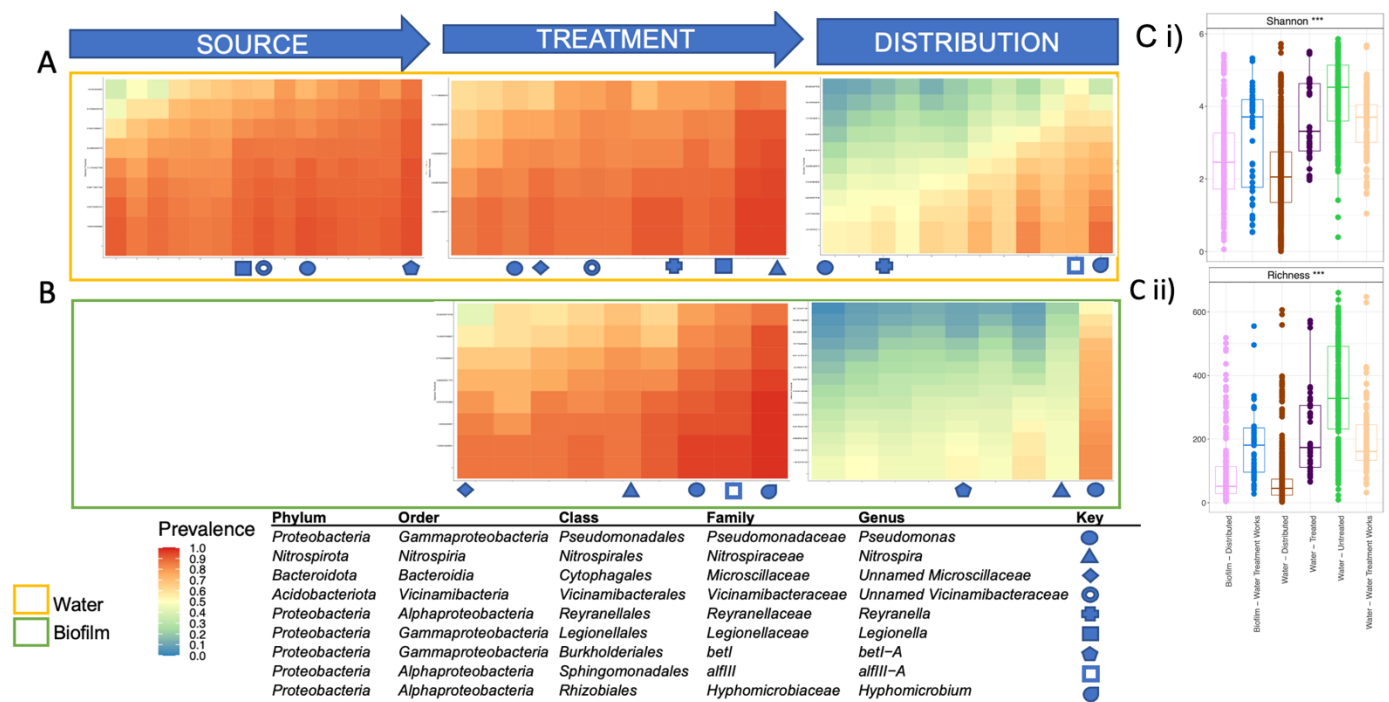

354 Figure 3: A. Core microbiome analysis of the different meta-sample groups from source through treatment and distribution  
 355 for bulk water and B for biofilm. Minimum prevalence was set at 0.85 for all groups except Distributed Bulk Water and  
 356 Untreated water, set at 0.95 due to the high number of samples in those groups. C: the alpha diversity of the various meta-  
 357 sample groups, displaying i) Shannon values and ii) Richness.

358

359 The amount of diversity within each sample, or alpha diversity, can be seen in Figure 3(C).

360 Across the different sample groups, the within-sample Richness values were significantly

361 different. The highest degree of sequence diversity in terms of Richness and Shannon index

362 values came from untreated water. A reduction in these values was evident in the treatment

363 and distribution groups, in biofilm and bulk water. Biofilm samples have elevated Shannon

364 values compared to bulk water, although Richness was remarkably similar. Core microbiome

365 analysis proposed several prevalent taxa within more than one sample group, although the

366 overall taxa prevalence reduced in distribution samples. *Pseudomonas* was the only taxa

367 common to all stages of water treatment and distribution. *Nitrospira* was prevalent within

368 water treatment works and in distribution biofilm, but not bulk water. *Legionella* was

369 abundant in bulk water only, in untreated and in treatment samples. *Burkholderiales betI-A*  
370 was prevalent in source water and distribution biofilm samples.

371

### 372 3.3 Local Contribution to Beta Diversity

373

374 Due to the unequal data classes with high degrees of spatial and temporal variation, estimates  
375 of beta diversity used Local Contribution to Beta diversity (LCBD) for all meta-sample  
376 groups (Figure 4) rather than a direct measure of beta diversity. LCBD values were only  
377 above the significance threshold for two categories when calculated using Unifrac distance:  
378 untreated water and distribution biofilm. For Bray-Curtis, all groups had greater than the  
379 calculated threshold (0.00052) LCBD except distribution water, with biofilm samples having  
380 the highest value. NTI and NRI values for the meta-sample groups were similar except for  
381 untreated water, which was the only category with values <0, indicating the taxa present are  
382 more dissimilar than in the other categories. Biofilm and bulk water in distribution had  
383 almost equal NRI/NTI indicating no significant difference in the amount of species  
384 relatedness between these groups.

385

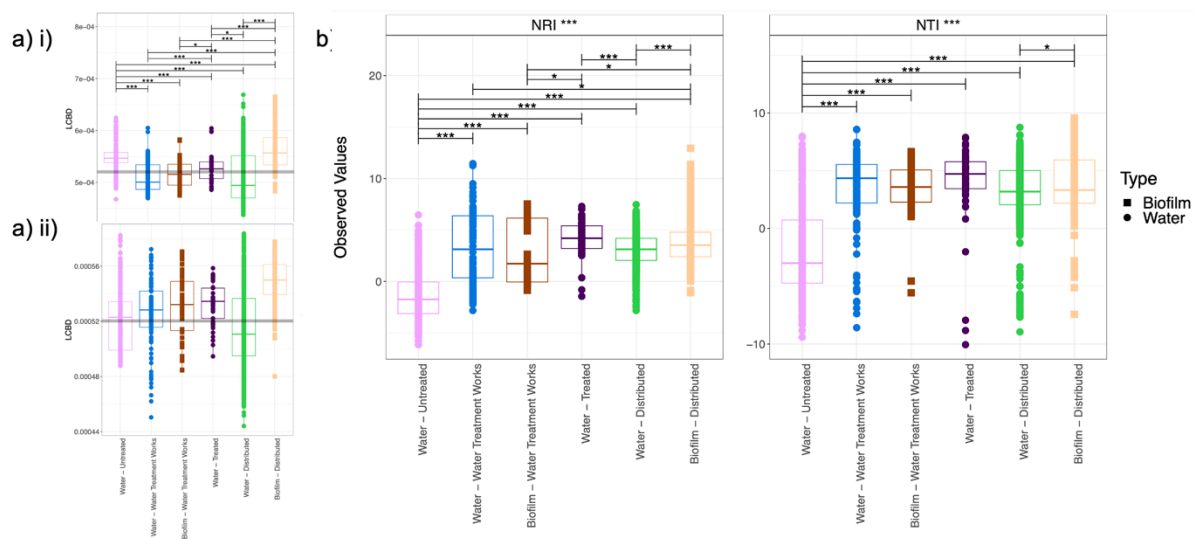

386

387 Figure 4: a) Local contribution to beta diversity values for all meta-sample groups using Unifrac (i) and Bray (ii). B) net  
388 relatedness index (NRI) and nearest taxon index (NTI) of all meta-sample groups in this meta-analysis.

389

### 390 3.4 Normalised Stochasticity Ratio

391

392 The NST and MST displayed in Figure 5 quantify the relative importance of stochasticity for  
393 each meta-sample group. Phylogenetic distances calculated using Jaccard with and without  
394 abundances (Ruzicka approach). Both measures produced comparable results. NST values of  
395  $>0.5$  are considered to be more stochastic. Untreated and samples prior to disinfection had  
396 NST values greater than 0.5, as did those in distributed bulk water. Meta-samples  
397 immediately post disinfection (treated water) had reduced stochasticity (0.45), indicating a  
398 greater degree of determinism in community assembly at this stage of the process. Biofilms  
399 in water treatment works had the lowest NST values, 0.42, showing higher determinism  
400 within these samples. MST values (modified ratio) are much lower, although the most  
401 deterministic groups are the same as in the NST. Untreated water samples have the highest  
402 degree of stochasticity when using MST compared to distributed bulk water and biofilm  
403 samples when using NST.

404

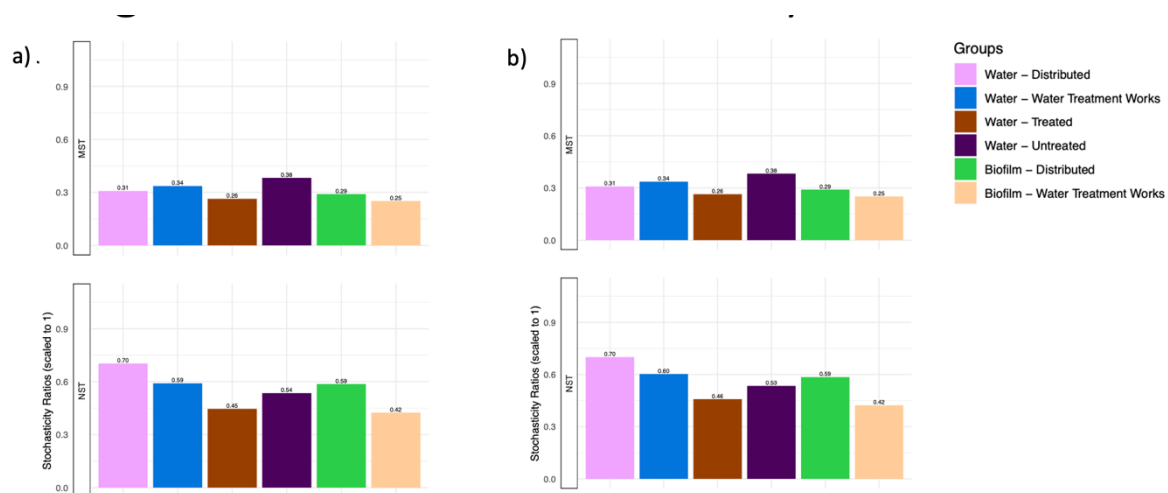

405

406 Figure 5: Normalised Stochasticity ratio (NST) and b) Modified Stochasticity Ratio (MST) values for all meta-sample groups  
 407 using a) Jaccard measures of phylogenetic distance and b) Ruzicka measures. Ruzicka is as Jaccard except those relative  
 408 abundances are not considered.

409

### 410 3.5 Boolean Relationships

411 The results of the Boolean analysis to identify individual relationships between ASVs in the  
 412 dataset at 2 and 3-dimensional levels is displayed in Figure 6.

413

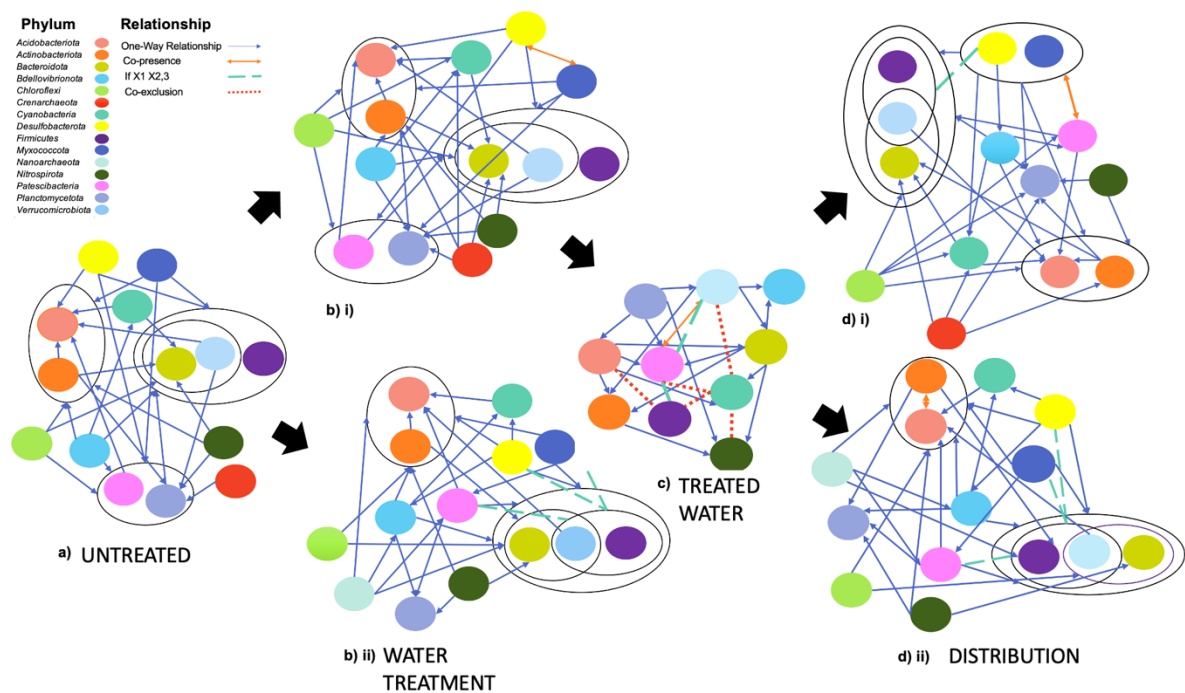

414

415 Figure 6: Visual representation of individual Boolean relationships identified between Phyla for all meta-sample groups in  
 416 this study, using methodology from Golovko et al. (2020). Minimal presence threshold set at 0.05%, maximum at 0.1%.

417 Groups are a) Untreated water; b) i) samples taken from bulk water throughout treatment; b) ii) biofilm from water treatment

418 processes; c) disinfected water; d) i) water from distribution systems and d) ii) biofilm from pipes in distribution. 2-

419 dimensional relationships detected included one-way relationships (blue arrow); co-presence (orange arrow), and co-

420 exclusion (red dashed line). There was one 3-dimensional relationship if ASV 1 is present, ASV 2 and 3 are also present

421 (long dashed line).

422

423 The analysis identified many one-way relationships between individual phyla across all

424 stages of the treatment and distribution process, many of which were present in several

425 groups. These phyla were common to all sample groups  
426 except *Nanoarchaeota* and *Crenoarchaeota*, present only in distribution bulk water and  
427 biofilm, respectively. Many of these phyla exhibited this relationship in all groups, such  
428 as *Acidobacteriota* and *Actinobacteriota*. When *Acidobacteriota* is  
429 present, *Actinobacteriota* is also present. This relationship is one-way in all categories except  
430 biofilm in the distribution system, where they exhibit a co-presence relationship. Treated  
431 water samples had the lowest number of phyla relationships within the dataset, and this was  
432 the only meta-group to have any co-exclusion relationships detected. *Cyanobacteria* were in  
433 a co-exclusionary relationship with three other phyla: *Verrucomicrobiota*, *Firmicutes*,  
434 *Nitrospirota*, and *Patescibacteria*. *Acidobacteriota* and *Firmicutes* were also co-excluded.  
435 Relationships from samples in distribution were more like those in the untreated and partially  
436 treated samples, with large numbers of one-way relationships between the Phyla in biofilm  
437 and bulk water.

438

## 439 4. Discussion

440

### 441 4.1 Principles governing microbiomes in DWDS

442 Taxonomic profiles of the various meta-sample groups identified significant differences in  
443 abundances of genera throughout the source, treatment, and distribution of water. There are  
444 higher degrees of species richness and alpha diversity of taxa in the source waters that are  
445 reduced throughout treatment. This reduction is consistent with both the individual studies  
446 included in this analysis and several other pyrosequencing studies<sup>23,31,52</sup>. The reduction in  
447 LCBD from untreated to treated water samples supports the reduction in alpha diversity and  
448 richness. A wide-scale study of 49 distribution systems in China had reduced diversity and

449 Richness in tap compared to source waters<sup>15</sup>. The similarity of taxa increases throughout  
450 treatment and distribution, indicative of selective processes driven by filtration and  
451 chlorination from which only some organisms can survive<sup>39-43</sup>.

452

453 Biofilm and bulk water samples from DWDS are quite different in terms of types and  
454 abundance of taxa. The core microbiomes for both these groups had only *Pseudomonas*  
455 common to both. Although *Pseudomonas* was the most abundant organism within biofilm  
456 core microbiome, it was the least abundant in bulk water samples. Local contribution to beta  
457 diversity was also most elevated in biofilm samples and was the only sample above the  
458 calculated threshold. This indicates that biofilm microbiomes contribute more to overall  
459 biodiversity within the pipe than the bulk water samples. This is important to consider, as the  
460 biofilm contains a quite different microbial profile than that of the bulk water, and sampling  
461 only bulk water may give a limited picture of the overall microbiome.

462

463 Modelling of microbiomes concentrates on the relative importance of random events on  
464 assembly, such as births, deaths, and environmental disturbance, this is compared to more  
465 deterministic events such as selection. As treatment and sources may be significant in  
466 determining the organisms in the treated water, this is an important measure to consider. All  
467 meta-sample groups, except treated water and distributed biofilm, had more stochastic values  
468 suggesting a greater degree of randomness in microbiome assembly. However, samples  
469 immediately after disinfection with chlorine had a more deterministic value. *Proteobacteria*,  
470 in particular: *Pseudomonas*, *Actinobacter*, and *Rheinheimera* have been demonstrated to  
471 dominate post disinfection, supporting the deterministic influence of treatment<sup>53</sup>. It also  
472 suggests that although filtration is important in defining taxa in DWDS, chlorine has a more  
473 strongly selective effect. This hypothesis supports a study comparing two identical treatment

474 systems treating the same source water, where chlorine and chloramine produced different  
475 bacterial communities<sup>23</sup>. Biofilms in water treatment works also had higher NST values,  
476 indicating a higher degree of determinism. The higher value supports the hypothesis that the  
477 effects of treatment and source reduce with distance and time from treatment<sup>15,19,52</sup>. This  
478 increased determinism could be due to the influence of prior treatment and source water on  
479 the biofilm, but also the material and conditions within the pipe. There may be other factors  
480 too, such as the flow conditions, within the DWDS influencing the biofilm. This had been  
481 demonstrated by laboratory experiments using experimental pipe loops with the same influent  
482 water under different flow rates resulting in biofilms containing some shared core taxa but  
483 with differences in their relative abundances, influenced by the flow conditions within each  
484 loop<sup>30</sup>.

485

486 Identification of significant one, two, and three-way relationships between individual Phyla  
487 in the meta-sample groups demonstrates the complexity of the drinking water microbiome.  
488 Several Phyla are proposed to be important in DWDS. A long-term study of a drinking water  
489 microbiome identified seven dominant phyla (*Proteobacteria*, *Bacteroidetes*, *Actinobacteria*,  
490 *Nitrospira*, *OD1*, *Planctomycetes*, and *Acidobacteria*)<sup>12</sup>. Six further phyla were also proposed  
491 by an Ion torrent study of DWDS in the Netherlands (*Chloroflexi*, *Elusimicrobia*,  
492 *Chlamydiae*, *Firmicutes*, *TM7*, and *Verrucomicrobia*)<sup>54</sup>. A number of these Phyla are  
493 involved in at least one one-way relationship with other phyla within all meta-sample  
494 groups: *Actinobacteria*; *Bacteriodetes*; *Planctomycetes*; *Chloroflexi*; *Firmicutes*;  
495 *Verrucomicrobiota*. This further supports their importance in the microbiome of DWDS.  
496 Understanding these relationships may be a crucial first step in shaping a biostable  
497 microbiome throughout the DWDS which in turn could be exploited to control pathogens.  
498 For example, *Firmicutes*, which may contain several known pathogenic organisms, form co-

499 exclusionary relationships with other phyla, post disinfection with chlorine, suggesting  
500 competition between them and *Cyanobacteria*, *Acidobacteriota*, and *Patescibacteriota*. The  
501 Boolean analysis confirmed that overall, phyla relationships are reduced by the addition of  
502 chlorine. In the future can this new understanding as shown here be exploited to shape  
503 microbial communities to the exclusion of pathogens.

504

505 This key finding was revealed from a limited comparison of studies primarily focused on the  
506 DWDS bulk water. Therefore, there is a need to explore further the influences of source and  
507 treatment processes on treatment, DWDS bulk water and biofilm to explore further the  
508 ecological rules and relationships between taxa. Further sampling of these stages is required  
509 for water authorities to understand the drivers of overall diversity, implication of treatment  
510 and distributions and the influence on pathogenic microbes within DWDS.

511

#### 512 4.2 Applying 16S rRNA Amplicon Sequencing for Water Utilities

513

514 As expected, the 25 most abundant taxa in the analysis did not contain any organisms  
515 traditionally used to indicate contamination, as these should be in low abundance in treated  
516 water. There were no coliforms identified in the core microbiome for any meta-sample  
517 groups. There was also a lack of any *Enterobacteria* in the most abundant taxa for any meta-  
518 groups' taxa profile or core microbiome analysis, demonstrating that faecal organisms are in  
519 low abundance in DWDS. An analysis of untreated water samples in isolation also failed to  
520 identify any highly abundant *Enterobacteriaceae*. These results suggest that 16S rRNA  
521 amplicon sequencing is not appropriate for the detection of traditional indicator organisms  
522 like coliforms but does suggest that these organisms are not a part of the microbiome under  
523 normal operating conditions, although whether their detection is indicative of contamination



524 is not covered by this study. Coliform bacteria are considered indicators of process  
525 performance, rather than faecal contamination (except *E. coli*) due to their prevalence in  
526 some environments and lack of correlation to other enteric pathogens<sup>9,55,56</sup>. This study further  
527 suggests that their overall lack of abundance in untreated water makes them a poor indicator  
528 of process performance.

529

530 This analysis did reveal some organisms of concern as abundant in DWDS, although  
531 different organisms were of concern in different DWDS, consistent with the proposed  
532 system-specific nature of DWDS microbiomes<sup>54</sup>. Of note, *Mycobacterium* was abundant in  
533 both chlorinated and chloraminated DWDS, but was not prevalent in non-chlorine distributed  
534 water. *Mycobacterium* is an emerging pathogen of concern for water utilities and dominates  
535 in some DWDS<sup>32,57</sup>. *Nitrosomonas* and *Nitrospira* were also highly prevalent in the biofilm  
536 of chloraminated DWDS, supporting the results of individual studies<sup>21,22</sup>. Improving  
537 understanding of the processes that select for and remove nitrifiers  
538 like *Nitrosomonas* and *Nitrospira*, is also important to assess the risk of nitrification within  
539 DWDS. *Burkholderiales* was a highly prevalent member of the core microbiome, consistent  
540 with other results proposing that this organism is under selection by treatment processes and  
541 is resistant to chlorination<sup>21,58</sup>. Although the high abundance of these organisms was only in  
542 one DWDS in this analysis, it highlights the need for more studies to be added to understand  
543 if this is a general finding.

544

545 If water utilities can optimise processes to select for non-pathogenic microbes, this can  
546 reduce the risk of illness from drinking water, something suggested in several studies<sup>30,35,36</sup>.  
547 An overview of microbial communities' dynamics, as ascertained by 16S rRNA amplicon  
548 studies aids inform a holistic view and response of water treatment and DWDS system

549 microbiology. This understanding will aid management to maintain water quality and will  
550 enable control of the drinking water microbiome and pathogens.

551

552 16S rRNA studies are becoming more popular and routine for the molecular analysis of water  
553 treatment and distribution. As demonstrated here, they provide extensive information  
554 revealing diverse communities that are influenced by the treatment process. However,  
555 translating this information into practice to inform and predict water quality is not always  
556 obvious to water utilities. However, taking a global meta-analysis view, this analysis  
557 highlighted several ways in which water utilities might employ 16S rRNA sequencing to  
558 improve drinking water quality. Considering whole microbial community dynamics from  
559 source to water, bulk and biofilm, this review has identified several organisms highly  
560 abundant throughout source and treatment, that can be potentially used to benchmark  
561 performance and monitor risk. *Pseudomonas* and *Mycobacterium* were all abundant in  
562 DWDS, while *Legionella* was abundant in source and treatment stages. Members of these  
563 group are known pathogens of concern for drinking water quality. In particular, the higher  
564 abundance of *Legionella* in source waters and treatment in this analysis may make it a good  
565 indicator of treatment performance, especially as other studies have detected *Legionella* in  
566 treated water samples<sup>41,42,57</sup>. *Legionella* is an emerging pathogen of concern to the water  
567 industry, and in the UK may be included in future water quality regulations. Amplicon  
568 sequencing can also allow water utilities to assess the risk of non-compliance with these  
569 regulations, although the viability of the organisms must also be considered using an  
570 alternative method.

571

572 Flow Cytometry (FCM) may provide the appropriate information to compliment 16S rRNA  
573 sequencing. Using FCM with the intercalating dyes SYBr Green and propidium iodide to

574 stain genetic material *in situ* within a sample gives a quantitative measure of the intact cells  
575 within the microbiome of DWDS. This is due to the ability of SYBr green to permeate intact  
576 cell membranes, whereas propidium iodide cannot. Dead cells therefore appear red, where  
577 intact cells fluoresce green, allowing each to be distinguished by the FCM. This approach has  
578 been extensively explored in studies assessing water treatment cell removal, DWDS regrowth  
579 and seasonal changes within microbiomes<sup>59–62</sup>. FCM can also provide more information than  
580 just the count of cells within a sample, using the relative fluorescence and a statistical binning  
581 process, cells can be grouped into populations which can then be tracked<sup>63,64</sup>. A quantitative  
582 measure of the intact cell population in relation to the total count of cells within a sample  
583 could be used by utilities to quantify the viability of the organisms identified using a 16S  
584 rRNA amplicon sequencing, enhancing the benefits of both analyses.

585

586 Measures of species richness and abundance such as alpha diversity and LCBD at treatment  
587 and distribution stages are useful to water utilities when comparing DWDS performance.  
588 Although monitoring the relative abundance of specific taxa in a single DWDS may not be  
589 able to detect a risk to public health directly, an understanding of these values across different  
590 DWDS allow water utilities to assess the impacts of source, treatment and distribution  
591 conditions on water quality and make more informed choices on asset investment.  
592 Understanding the relative impacts of stochasticity in DWDS microbiomes is also a useful  
593 exercise for water utilities. Higher stochastic values in bulk water and biofilm of DWDS  
594 suggest that random events are more important than treatment processes or other prior  
595 deterministic events in determining the bacterial communities. In contrast, biofilm  
596 communities in water treatment works and bulk treated water are more deterministic, affected  
597 by the abiotic conditions (e.g., chlorine, pH, pipe material) and prior treatment processes.

598 Managing biofilm and ensuring treatment processes remove microbes of concern is where  
599 water utilities can most effectively minimise risk to public health.

## 600 5. Conclusions

601 There are copious quantities of data from amplicon sequencing studies in drinking water  
602 treatment and distribution. Although many of these studies provide only a descriptive  
603 understanding of the microbiome. As a result, this information has yet to be used to predict  
604 and direct microbial water quality. There has been a reluctance to adopt the technology  
605 among water utilities, as the benefits are not immediately clear. Using a meta-analysis  
606 approach, we have shown that while treatment and distribution of water significantly reduces  
607 the diversity and abundance of taxa present in the source the subsequent assembly of  
608 microbiomes in drinking water is a stochastic process, particularly in the DWDS. This  
609 demonstrates that the effects of source and treatment diminish with distance from treatment  
610 and time. Only the assembly of microbiomes at the point of chlorination are more  
611 deterministic, due to selection pressures on organisms that cannot survive oxidation.

612 Although 16S rRNA amplicon sequencing cannot satisfy current water quality regulation, it  
613 can assess the risk from emerging pathogens such as *Legionella* or *Mycobacterium* - which  
614 may be in high abundance in DWDS - and track significant changes in the microbiome,  
615 which may be associated with contamination or changes in process performance. These are  
616 benefits which traditional culture-tests cannot provide. However, further work is required to  
617 standardise sequencing and data analysis methods for 16S rRNA amplicon sequencing  
618 methods to enable them to be applied within the water industry as standard practice.

619

## 620 Acknowledgements

621 Funding: CT. Scottish Water Industry Funded PhD studentship; CJS Royal Academy of  
622 Engineering-Scottish Water Research Chair (RCSRF171864), UZI is supported by NERC,  
623 UK, NE/L011956/1.

624

625

## 626 References

- 627 1. Jalava, K. *et al.* Novel microbiological and spatial statistical methods to improve  
628 strength of epidemiological evidence in a community-wide waterborne outbreak.  
629 *PLoS One* **9**, 104713 (2014).
- 630 2. Payment, P. & Locas, A. Pathogens in Water: Value and Limits of Correlation with  
631 Microbial Indicators. *Ground Water* **49**, 4–11 (2011).
- 632 3. Fricker, C. R. & Eldred, B. J. Identification of coliform genera recovered from water  
633 using different technologies. *Lett. Appl. Microbiol.* **49**, 685–688 (2009).
- 634 4. Saxena, G., Bharagava, R. N., Kaithwas, G. & Raj, A. Microbial indicators, pathogens  
635 and methods for their monitoring in water environment. *J. Water Health* **13**, 319–339  
636 (2015).
- 637 5. Leclerc, H., Mossel, D. A. A., Edberg, S. C. & Struijk, C. B. Advances in the Bacteriology  
638 of the Coliform Group: Their Suitability as Markers of Microbial Water Safety. *Annu.*  
639 *Rev. Microbiol.* **55**, 201–234 (2001).
- 640 6. DWI. Public Drinking Water Quality 2020. *Annual Report (2020)*. Available at:  
641 <https://www.dwi.gov.uk/what-we-do/annual-report/drinking-water-2020/>.  
642 (Accessed: 17th June 2021)

- 643 7. Rappé, M. S. & Giovannoni, S. J. The Uncultured Microbial Majority. *Annual Review of*  
644 *Microbiology* **57**, 369–394 (2003).
- 645 8. Hahn, M. W., Koll, U. & Schmidt, J. Isolation and Cultivation of Bacteria. in *The*  
646 *Structure and Function of Aquatic Microbial Communities* 313–351 (Springer, Cham,  
647 2019). doi:10.1007/978-3-030-16775-2\_10
- 648 9. Savichtcheva, O. & Okabe, S. Alternative indicators of fecal pollution: Relations with  
649 pathogens and conventional indicators, current methodologies for direct pathogen  
650 monitoring and future application perspectives. *Water Research* **40**, 2463–2476  
651 (2006).
- 652 10. Cabral, J. P. S. Water microbiology. Bacterial pathogens and water. *Int. J. Environ. Res.*  
653 *Public Health* **7**, 3657–3703 (2010).
- 654 11. Lin, W., Yu, Z., Zhang, H. & Thompson, I. P. Diversity and dynamics of microbial  
655 communities at each step of treatment plant for potable water generation. *Water*  
656 *Res.* **52**, 218–230 (2014).
- 657 12. Pinto, A. J., Xi, C. & Raskin, L. Bacterial Community Structure in the Drinking Water  
658 Microbiome Is Governed by Filtration Processes. *Environ. Sci. Technol.* **46**, 8851–8859  
659 (2012).
- 660 13. Fox, E. J. & Reid-Bayliss, K. S. Accuracy of Next Generation Sequencing Platforms. *J.*  
661 *Next Gener. Seq. Appl.* **01**, (2014).
- 662 14. Vierheilig, J. *et al.* Potential applications of next generation DNA sequencing of 16S  
663 rRNA gene amplicons in microbial water quality monitoring. *Water Sci. Technol.* **72**,  
664 1962–1972 (2015).
- 665 15. Han, Z., An, W., Yang, M. & Zhang, Y. Assessing the impact of source water on tap  
666 water bacterial communities in 46 drinking water supply systems in China. *Water Res.*

- 667           **172**, 115469 (2020).
- 668    16.    De Vera, G. A., Gerrity, D., Stoker, M., Frehner, W. & Wert, E. C. Impact of upstream  
669           chlorination on filter performance and microbial community structure of GAC and  
670           anthracite biofilters. *Environ. Sci. Water Res. Technol.* **4**, 1133–1144 (2018).
- 671    17.    Gerrity, D. *et al.* Microbial community characterization of ozone-biofiltration systems  
672           in drinking water and potable reuse applications. *Water Res.* **135**, 207–219 (2018).
- 673    18.    Wang, H., Pryor, M. A., Edwards, M. A., Falkinham, J. O. & Pruden, A. Effect of GAC  
674           pre-treatment and disinfectant on microbial community structure and opportunistic  
675           pathogen occurrence. *Water Res.* **47**, 5760–5772 (2013).
- 676    19.    Potgieter, S. *et al.* Long-term spatial and temporal microbial community dynamics in a  
677           large-scale drinking water distribution system with multiple disinfectant regimes.  
678           *Water Res.* **139**, 406–419 (2018).
- 679    20.    Gülay, A. *et al.* Ecological patterns, diversity and core taxa of microbial communities  
680           in groundwater-fed rapid gravity filters. *ISME J.* **10**, 2209–2222 (2016).
- 681    21.    Shaw, J. L. A. A. *et al.* Using Amplicon Sequencing To Characterize and Monitor  
682           Bacterial Diversity in Drinking Water Distribution Systems. *Appl. Environ. Microbiol.*  
683           **81**, 6463–6473 (2015).
- 684    22.    Chan, S. *et al.* Bacterial release from pipe biofilm in a full-scale drinking water  
685           distribution system. *npj Biofilms Microbiomes* **5**, 9 (2019).
- 686    23.    Potgieter, S. C. & Pinto, A. J. Reproducible microbial community dynamics of two  
687           drinking water systems treating similar source waters. *bioRxiv Microbiol.* 678920  
688           (2019). doi:10.1101/678920
- 689    24.    Wu, H. *et al.* Biofilm bacterial communities in urban drinking water distribution  
690           systems transporting waters with different purification strategies. *Appl. Microbiol.*

- 691 *Biotechnol.* **99**, 1947–1955 (2014).
- 692 25. Prest, E. I. *et al.* Combining flow cytometry and 16S rRNA gene pyrosequencing: A  
693 promising approach for drinking water monitoring and characterization. *Water Res.*  
694 **63**, 179–189 (2014).
- 695 26. Ghaju Shrestha, R. *et al.* Next-generation sequencing identification of pathogenic  
696 bacterial genes and their relationship with fecal indicator bacteria in different water  
697 sources in the Kathmandu Valley, Nepal. *Sci. Total Environ.* **601–602**, 278–284 (2017).
- 698 27. McCoy, S. T. & VanBriesen, J. M. Temporal Variability of Bacterial Diversity in a  
699 Chlorinated Drinking Water Distribution System. *J. Environ. Eng.* **138**, 786–795 (2012).
- 700 28. Bautista-de los Santos, Q. M. *et al.* The impact of sampling, PCR, and sequencing  
701 replication on discerning changes in drinking water bacterial community over diurnal  
702 time-scales. *Water Res.* **90**, 216–224 (2016).
- 703 29. Wolf-Baca, M. & Piekarska, K. Biodiversity of organisms inhabiting the water supply  
704 network of Wroclaw. Detection of pathogenic organisms constituting a threat for  
705 drinking water recipients. *Sci. Total Environ.* **715**, 136732 (2020).
- 706 30. Douterelo, I., Jackson, M., Solomon, C. & Boxall, J. Spatial and temporal analogies in  
707 microbial communities in natural drinking water biofilms. *Sci. Total Environ.* **581–582**,  
708 277–288 (2017).
- 709 31. Bautista-De los Santos, Q. M. *et al.* Emerging investigators series: microbial  
710 communities in full-scale drinking water distribution systems – a meta-analysis.  
711 *Environ. Sci. Water Res. Technol.* **2**, 631–644 (2016).
- 712 32. Zhu, J. *et al.* Mycobacterial metabolic characteristics in a water meter biofilm  
713 revealed by metagenomics and metatranscriptomics. *Water Res.* **153**, 315–323  
714 (2019).



- 715 33. Lührig, K. *et al.* Bacterial community analysis of drinking water biofilms in southern  
716 Sweden. *Microbes Environ.* **30**, 99–107 (2015).
- 717 34. Liu, G. *et al.* Potential impacts of changing supply-water quality on drinking water  
718 distribution: A review. *Water Research* **116**, 135–148 (2017).
- 719 35. Douterelo, I., Sharpe, R. L., Husband, S., Fish, K. E. & Boxall, J. B. Understanding  
720 microbial ecology to improve management of drinking water distribution systems.  
721 *Wiley Interdiscip. Rev. Water* **6**, e01325 (2019).
- 722 36. Fish, K. E. & Boxall, J. B. Biofilm Microbiome (Re)Growth Dynamics in Drinking Water  
723 Distribution Systems Are Impacted by Chlorine Concentration. *Front. Microbiol.* **9**,  
724 2519 (2018).
- 725 37. Uyaguari-Diaz, M. I. *et al.* Microbial community dynamics of surface water in British  
726 Columbia, Canada. *bioRxiv* 719146 (2019). doi:10.1101/719146
- 727 38. Ahmed, W. *et al.* Toolbox Approaches Using Molecular Markers and 16S rRNA Gene  
728 Amplicon Data Sets for Identification of Fecal Pollution in Surface Water. *Appl.*  
729 *Environ. Microbiol.* **81**, 7067–7077 (2015).
- 730 39. Lautenschlager, K. *et al.* Abundance and composition of indigenous bacterial  
731 communities in a multi-step biofiltration-based drinking water treatment plant.  
732 *Water Res.* **62**, 40–52 (2014).
- 733 40. Wang, H., Masters, S., Edwards, M. A., Falkinham, J. O. & Pruden, A. Effect of  
734 Disinfectant, Water Age, and Pipe Materials on Bacterial and Eukaryotic Community  
735 Structure in Drinking Water Biofilm. *Environ. Sci. Technol.* **48**, 1426–1435 (2014).
- 736 41. Vignola, M., Werner, D., Wade, M. J., Meynet, P. & Davenport, R. J. Medium shapes  
737 the microbial community of water filters with implications for effluent quality. *Water*  
738 *Res.* **129**, 499–508 (2018).

- 739 42. Hou, L. *et al.* Spatiotemporal changes in bacterial community and microbial activity in  
740 a full-scale drinking water treatment plant. *Sci. Total Environ.* **625**, 449–459 (2018).
- 741 43. Wan, K. *et al.* Organic carbon: An overlooked factor that determines the antibiotic  
742 resistome in drinking water sand filter biofilm. *Environ. Int.* **125**, 117–124 (2019).
- 743 44. Gensberger, E. T. *et al.* Evaluation of quantitative PCR combined with PMA treatment  
744 for molecular assessment of microbial water quality. *Water Res.* **67**, 367–376 (2014).
- 745 45. Ruike, W., Higashimori, A., Yaguchi, J. & Li, Y. Use of real-time PCR with propidium  
746 monoazide for enumeration of viable *Escherichia coli* in anaerobic digestion. *Water*  
747 *Sci. Technol.* **74**, 1243–1254 (2016).
- 748 46. Liu, J. *et al.* Occurrence and Fate of Ultramicrobacteria in a Full-Scale Drinking Water  
749 Treatment Plant. *Front. Microbiol.* **9**, 2922 (2018).
- 750 47. Liu, G. *et al.* Hotspots for selected metal elements and microbes accumulation and  
751 the corresponding water quality deterioration potential in an unchlorinated drinking  
752 water distribution system. *Water Res.* **124**, 435–445 (2017).
- 753 48. Nearing, J. T., Douglas, G. M., Comeau, A. M. & Langille, M. G. I. Denoising the  
754 Denoisers: An independent evaluation of microbiome sequence error- correction  
755 approaches. *PeerJ* **2018**, (2018).
- 756 49. Keating, C., Trego, A. C., Sloan, W., O’Flaherty, V. & Ijaz, U. Z. Circular Economy of  
757 Anaerobic Biofilm Microbiomes: A Meta-Analysis Framework for Re-exploration of  
758 Amplicon Sequencing Data. *bioRxiv* 2020.12.23.424166 (2020).  
759 doi:10.1101/2020.12.23.424166
- 760 50. Leo Lahti, S. S. Introduction to the microbiome R package. (2017). Available at:  
761 <https://bioconductor.org/packages/devel/bioc/vignettes/microbiome/inst/doc/vignette.html>.  
762 (Accessed: 7th April 2021)

- 763 51. Legendre, P. & De Cáceres, M. Beta diversity as the variance of community data:  
764 Dissimilarity coefficients and partitioning. *Ecol. Lett.* **16**, 951–963 (2013).
- 765 52. Pinto, A. J., Schroeder, J., Lunn, M., Sloan, W. & Raskin, L. Spatial-Temporal Survey  
766 and Occupancy-Abundance Modeling To Predict Bacterial Community Dynamics in  
767 the Drinking Water Microbiome. *MBio* **5**, (2014).
- 768 53. Becerra-Castro, C., Macedo, G., Silva, A. M. T., Manaia, C. M. & Nunes, O. C.  
769 Proteobacteria become predominant during regrowth after water disinfection. *Sci.*  
770 *Total Environ.* **573**, 313–323 (2016).
- 771 54. Roeselers, G. *et al.* Microbial biogeography of drinking water: Patterns in  
772 phylogenetic diversity across space and time. *Environ. Microbiol.* **17**, 2505–2514  
773 (2015).
- 774 55. Ishii, S., Ksoll, W. B., Hicks, R. E. & Sadowsky, M. J. Presence and growth of naturalized  
775 *Escherichia coli* in temperate soils from lake superior watersheds. *Appl. Environ.*  
776 *Microbiol.* **72**, 612–621 (2006).
- 777 56. Ishii, S. & Sadowsky, M. J. *Escherichia coli* in the Environment: Implications for Water  
778 Quality and Human Health. *microbes and genomes* **23**, 101–108 (2008).
- 779 57. Ashbolt, N. J. Microbial Contamination of Drinking Water and Human Health from  
780 Community Water Systems. *Current environmental health reports* **2**, 95–106 (2015).
- 781 58. Liu, G. *et al.* Pyrosequencing Reveals Bacterial Communities in Unchlorinated Drinking  
782 Water Distribution System: An Integral Study of Bulk Water, Suspended Solids, Loose  
783 Deposits, and Pipe Wall Biofilm. *Environ. Sci. Technol.* **48**, 5467–5476 (2014).
- 784 59. Prest, E. I., Hammes, F., Köttsch, S., Van Loosdrecht, M. C. M. & Vrouwenvelder, J. S.  
785 A systematic approach for the assessment of bacterial growth-controlling factors  
786 linked to biological stability of drinking water in distribution systems. *Water Sci.*

- 787            *Technol. Water Supply* **16**, 865–880 (2016).
- 788    60.    Hassard, F. *Understanding the Use of Flow Cytometry for Monitoring of Drinking*  
789            *Water. DWI Reports* (2019).
- 790    61.    Hammes, F., Goldschmidt, F., Vital, M., Wang, Y. & Egli, T. Measurement and  
791            interpretation of microbial adenosine tri-phosphate (ATP) in aquatic environments.  
792            *Water Res.* **44**, 3915–3923 (2010).
- 793    62.    Besmer, M. D. & Hammes, F. Short-term microbial dynamics in a drinking water plant  
794            treating groundwater with occasional high microbial loads. *Water Res.* **107**, 11–18  
795            (2016).
- 796    63.    Props, R., Monsieurs, P., Mysara, M., Clement, L. & Boon, N. Measuring the  
797            biodiversity of microbial communities by flow cytometry. *Methods Ecol. Evol.* **7**,  
798            1376–1385 (2016).
- 799    64.    Favere, J., Buysschaert, B., Boon, N. & De Gusseme, B. Online microbial fingerprinting  
800            for quality management of drinking water: Full-scale event detection. *Water Res.* **170**,  
801            (2020).
- 802
- 803
- 804
